# Supplementary material for: The Challenges of the Israeli Water Sector in Times of Emergency with the Application of Seawater Desalination
Source: Preprints.org preprint supplement (doi:10.20944/preprints202407.0018.v1), 2024-07-01
Supplement: Supplementary file 1 [file supplementary]

**Title Page**

**The Challenges of the Israeli Water Sector in Times of Emergency** **with the Application of Seawater Desalination**

**Correspondent Author: Dr. Erez Cohen.**

**Affiliation:** Department of Middle Eastern Studies - Political Science. Ariel University Israel.

**Address**: Hahtzmaute st. No. 43. City: Petach- Tiqva. Israel.

**E- Mail**: [erez@ariel.ac.il](mailto:erez@ariel.ac.il) , **Phone No**. 972- 54 -7776436

**ORCID ID**: <https://orcid.org/0000-0002-6765-9825>

**Bio:** D.r Erez Cohen, PhD, is a Senior Lecturer in Political Science in the Department of Middle Eastern Studies, Ariel University. His books include: *Israel’s High-Tech Industry: no thought for the future* (Carmel Publishing House, 2009) and *Global Quake: world economics facing the 2008–2012 financial and political crises* (Ariel University Publishing, 2015). His researches and publications deals with public policy, Israel's economy, Economic Policy and Political Economy issues.
